# Supplementary material for: Bubonic plague: can the size of buboes be accurately and consistently measured with a digital calliper?
Source: Springer Nature journal article supplement (doi:10.1186/s13063-023-07835-7), 2023-12-19
Supplement: MOESM5 [file 26547206]

**S5 Table**

**A) Linear mixed effects regression model with a random effect of rater ID and fixed effects for density, oedema, year and size (with 95% confidence interval) to determine the effect of artificial bubo characteristics on measurement accuracy**

| <b>Characteristic</b>     | <b>Regression coefficient</b> | <b>95% CI</b>  | <b>p-value</b> |
|---------------------------|-------------------------------|----------------|----------------|
| <b>Size*</b>              |                               |                |                |
| <b>120.3mm</b>            | -5.51                         | -9.52 to -1.51 | 0.007          |
| <b>94.7</b>               | 3.22                          | -1.58 to 8.03  | 0.189          |
| <b>77.8</b>               | 16.1                          | 12.0 to 20.1   | <0.001         |
| <b>64.9</b>               | -13.2                         | 8.45 o 18.0    | <0.001         |
| <b>52.7</b>               | 40.5                          | 36.0 to 45.1   | <0.001         |
| <b>Density</b>            | -1.76                         | -5.01 to 1.48  | 0.287          |
| <b>Year</b>               | 9.44                          | 6.53 to 12.4   | <0.001         |
| <b>Presence of oedema</b> | 2.60                          | -0.95 to 6.16  | 0.151          |

\*Compared to largest artificial bubo (121.6mm)

**B) Number and percentage of measurements recorded within 5% intervals of the artificial bubo's true size, shown until 95% of all measurements are captured**

| Characteristic       | 5%           | 10%          | 15%          | 20%          | 25%          | 30%          | 35%          | 40%          | 45%          | 50%          | 55%          | 60%          | 65%          | 70%          | 75%          | 80%          | 85%          | 90%          | 95%          | 100%         |
|----------------------|--------------|--------------|--------------|--------------|--------------|--------------|--------------|--------------|--------------|--------------|--------------|--------------|--------------|--------------|--------------|--------------|--------------|--------------|--------------|--------------|
| Overall (N=698)      | 179<br>(26%) | 307<br>(44%) | 403<br>(58%) | 464<br>(66%) | 508<br>(73%) | 550<br>(79%) | 574<br>(82%) | 592<br>(85%) | 610<br>(87%) | 627<br>(90%) | 638<br>(91%) | 645<br>(92%) | 657<br>(94%) | 664<br>(95%) | -            | -            | -            | -            | -            | -            |
| Hard (N=349)         | 87<br>(25%)  | 147<br>(42%) | 197<br>(56%) | 223<br>(64%) | 244<br>(70%) | 270<br>(77%) | 284<br>(81%) | 294<br>(84%) | 309<br>(89%) | 319<br>(91%) | 321<br>(92%) | 326<br>(93%) | 331<br>(95%) | -            | -            | -            | -            | -            | -            | -            |
| Soft (N=349)         | 92<br>(26%)  | 160<br>(46%) | 206<br>(59%) | 241<br>(69%) | 264<br>(76%) | 280<br>(80%) | 290<br>(83%) | 298<br>(85%) | 301<br>(86%) | 308<br>(88%) | 317<br>(91%) | 319<br>(91%) | 326<br>(93%) | 328<br>(94%) | 336<br>(96%) | -            | -            | -            | -            | -            |
| Oedema (N=213)       | 66<br>(31%)  | 111<br>(52%) | 148<br>(69%) | 166<br>(78%) | 181<br>(85%) | 188<br>(88%) | 192<br>(90%) | 193<br>(91%) | 194<br>(91%) | 196<br>(92%) | 197<br>(92%) | 200<br>(94%) | 205<br>(96%) | -            | -            | -            | -            | -            | -            | -            |
| No oedema (N=485)    | 113<br>(23%) | 196<br>(40%) | 255<br>(53%) | 298<br>(61%) | 327<br>(67%) | 362<br>(75%) | 382<br>(79%) | 399<br>(82%) | 416<br>(86%) | 431<br>(89%) | 441<br>(91%) | 445<br>(92%) | 452<br>(93%) | 458<br>(94%) | 466<br>(96%) | -            | -            | -            | -            | -            |
| Size = 121.6 (N=108) | 36<br>(33%)  | 64<br>(59%)  | 86<br>(80%)  | 91<br>(84%)  | 97<br>(90%)  | 103<br>(95%) | -            | -            | -            | -            | -            | -            | -            | -            | -            | -            | -            | -            | -            | -            |
| Size = 120.3 (N=160) | 62<br>(39%)  | 96<br>(60%)  | 130<br>(81%) | 141<br>(88%) | 150<br>(94%) | 153<br>(96%) | -            | -            | -            | -            | -            | -            | -            | -            | -            | -            | -            | -            | -            | -            |
| Size = 94.7 (N=88)   | 26<br>(30%)  | 48<br>(55%)  | 57<br>(65%)  | 73<br>(83%)  | 76<br>(86%)  | 79<br>(90%)  | 81<br>(92%)  | 82<br>(93%)  | 84<br>(95%)  | -            | -            | -            | -            | -            | -            | -            | -            | -            | -            | -            |
| Size = 77.8 (N=150)  | 32<br>(21%)  | 56<br>(37%)  | 78<br>(52%)  | 91<br>(61%)  | 101<br>(67%) | 112<br>(75%) | 114<br>(76%) | 120<br>(80%) | 122<br>(81%) | 127<br>(85%) | 130<br>(87%) | 132<br>(88%) | 137<br>(91%) | 137<br>(91%) | 140<br>(93%) | 141<br>(94%) | 142<br>(95%) | -            | -            | -            |
| Size = 64.9 (N=86)   | 16<br>(19%)  | 33<br>(38%)  | 39<br>(45%)  | 46<br>(53%)  | 56<br>(65%)  | 69<br>(80%)  | 75<br>(87%)  | 77<br>(90%)  | 81<br>(94%)  | 82<br>(95%)  | -            | -            | -            | -            | -            | -            | -            | -            | -            | -            |
| Size = 52.7 (N=106)  | 7<br>(7%)    | 10<br>(9%)   | 13<br>(12%)  | 22<br>(21%)  | 28<br>(26%)  | 34<br>(32%)  | 40<br>(38%)  | 49<br>(46%)  | 59<br>(56%)  | 67<br>(63%)  | 74<br>(70%)  | 75<br>(71%)  | 82<br>(77%)  | 87<br>(82%)  | 94<br>(89%)  | 96<br>(91%)  | 97<br>(92%)  | 100<br>(94%) | 100<br>(94%) | 102<br>(96%) |

**C) Mean absolute difference (mm), standard deviation (SD) and limits of agreement (LoA) between raters' first and second measurements for all artificial buboes and per characteristic**

|                              | Median percentage difference (range) | Median absolute difference, mm (range) | LoA for BA plots* |       |
|------------------------------|--------------------------------------|----------------------------------------|-------------------|-------|
|                              |                                      |                                        | Lower             | Upper |
| <b>Overall (N = 239)</b>     | 11% (0% to 129%)                     | 11.84 (0.03 to 76.87)                  | -51.56            | 34.27 |
| <b>Hard (N = 121)</b>        | 12% (0% to 104%)                     | 11.84 (0.14 to 64.18)                  | -46.84            | 31.89 |
| <b>Soft (N = 118)</b>        | 11% (0% to 129%)                     | 12.2 (0.03 to 76.87)                   | -56.17            | 36.49 |
| <b>Oedema (N = 66)</b>       | 12% (0% to 129%)                     | 12.67 (0.03 to 76.87)                  | -54.83            | 31.60 |
| <b>No oedema (N = 173)</b>   | 12% (0% to 104%)                     | 11.46 (0.08 to 72.06)                  | -50.22            | 35.20 |
| <b>Size = 121.6 (N = 40)</b> | 9% (0% to 51%)                       | 11.69 (0.17 to 53.9)                   | -43.27            | 27.71 |
| <b>Size = 120.3 (N = 58)</b> | 9% (0% to 69%)                       | 11.22 (0.03 to 72.06)                  | -48.09            | 34.61 |
| <b>Size = 94.7 (N = 26)</b>  | 10% (0% to 54%)                      | 10.75 (0.40 to 56.58)                  | -50.01            | 34.39 |
| <b>Size = 77.8 (N = 51)</b>  | 15% (2% to 128%)                     | 13.24 (1.56 to 76.87)                  | -72.12            | 42.05 |
| <b>Size = 64.9 (N = 25)</b>  | 16% (0% to 38%)                      | 1.48 (0.08 to 26.40)                   | -31.28            | 22.77 |
| <b>Size = 52.7 (N = 39)</b>  | 12% (0% to 104%)                     | 10.87 (0.17 to 64.18)                  | -45.64            | 30.89 |

\*using +ve and -ve values



**E) Number and percentage of raters' second measurements recorded within 5% intervals of the raters' first measurement of the same artificial bubo, shown until 95% of all measurements are captured**

| <b>Characteristic</b>  | <b>5%<br/>n (%)</b> | <b>10%<br/>n (%)</b> | <b>15%<br/>n (%)</b> | <b>20%<br/>n (%)</b> | <b>25%<br/>n (%)</b> | <b>30%<br/>n (%)</b> | <b>35%<br/>n (%)</b> | <b>40%<br/>n (%)</b> | <b>45%<br/>n (%)</b> | <b>50%<br/>n (%)</b> | <b>55%<br/>n (%)</b> | <b>60%<br/>n (%)</b> | <b>65%<br/>n (%)</b> | <b>70%<br/>n (%)</b> | <b>75%<br/>n (%)</b> | <b>80%<br/>n (%)</b> | <b>85%<br/>n (%)</b> |
|------------------------|---------------------|----------------------|----------------------|----------------------|----------------------|----------------------|----------------------|----------------------|----------------------|----------------------|----------------------|----------------------|----------------------|----------------------|----------------------|----------------------|----------------------|
| Overall<br>(N=238)     | 56<br>(23%)         | 107<br>(45%)         | 145<br>(61%)         | 165<br>(69%)         | 174<br>(73%)         | 195<br>(82%)         | 203<br>(85%)         | 211<br>(88%)         | 219<br>(92%)         | 225<br>(94%)         | 227<br>(95%)         | -                    | -                    | -                    | -                    | -                    | -                    |
| Hard<br>(119)          | 33<br>(28%)         | 56<br>(47%)          | 75<br>(63%)          | 91<br>(76%)          | 94<br>(79%)          | 102<br>(86%)         | 105<br>(88%)         | 109<br>(92%)         | 113<br>(95%)         | -                    | -                    | -                    | -                    | -                    | -                    | -                    | -                    |
| Soft<br>(N=118)        | 29<br>(25%)         | 55<br>(47%)          | 73<br>(62%)          | 79<br>(67%)          | 84<br>(71%)          | 97<br>(82%)          | 100<br>(85%)         | 103<br>(87%)         | 104<br>(88%)         | 106<br>(90%)         | 108<br>(92%)         | 109<br>(92%)         | 109<br>(92%)         | 113<br>(95%)         | -                    | -                    | -                    |
| Oedema<br>(N=65)       | 10<br>(15%)         | 28<br>(43%)          | 44<br>(68%)          | 47<br>(72%)          | 49<br>(75%)          | 56<br>(86%)          | 58<br>(89%)          | 58<br>(89%)          | 58<br>(89%)          | 59<br>(91%)          | 61<br>(94%)          | 62<br>(95%)          | -                    | -                    | -                    | -                    | -                    |
| No oedema<br>(N=153)   | 44<br>(29%)         | 73<br>(48%)          | 92<br>(60%)          | 109<br>(71%)         | 114<br>(75%)         | 128<br>(84%)         | 132<br>(86%)         | 138<br>(90%)         | 142<br>(93%)         | 144<br>(94%)         | 147<br>(96%)         | -                    | -                    | -                    | -                    | -                    | -                    |
| Size = 121.6<br>(N=40) | 11<br>(28%)         | 22<br>(55%)          | 30<br>(75%)          | 33<br>(83%)          | 36<br>(90%)          | 37<br>(93%)          | 38<br>(95%)          | -                    | -                    | -                    | -                    | -                    | -                    | -                    | -                    | -                    | -                    |
| Size = 120.3<br>(N=58) | 15<br>(26%)         | 31<br>(53%)          | 43<br>(74%)          | 47<br>(81%)          | 48<br>(83%)          | 51<br>(88%)          | 52<br>(90%)          | 54<br>(93%)          | 56<br>(97%)          | -                    | -                    | -                    | -                    | -                    | -                    | -                    | -                    |
| Size = 94.7<br>(N=26)  | 7<br>(27%)          | 13<br>(50%)          | 16<br>(62%)          | 19<br>(73%)          | 19<br>(73%)          | 23<br>(88%)          | 24<br>(92%)          | 24<br>(92%)          | 24<br>(92%)          | 24<br>(92%)          | 26<br>(100%)         | -                    | -                    | -                    | -                    | -                    | -                    |
| Size = 77.8<br>(N=50)  | 8<br>(16%)          | 15<br>(30%)          | 24<br>(48%)          | 29<br>(58%)          | 31<br>(62%)          | 35<br>(70%)          | 37<br>(74%)          | 37<br>(74%)          | 38<br>(76%)          | 40<br>(80%)          | 42<br>(84%)          | 43<br>(86%)          | 43<br>(86%)          | 46<br>(92%)          | 47<br>(94%)          | 47<br>(94%)          | 48<br>(96%)          |
| Size = 64.9<br>(N=25)  | 6<br>(24%)          | 9<br>(36%)           | 12<br>(48%)          | 16<br>(64%)          | 17<br>(68%)          | 22<br>(88%)          | 23<br>(92%)          | 25<br>(100%)         | -                    | -                    | -                    | -                    | -                    | -                    | -                    | -                    | -                    |
| Size = 52.7<br>(N=39)  | 9<br>(23%)          | 17<br>(44%)          | 20<br>(51%)          | 21<br>(54%)          | 23<br>(59%)          | 27<br>(69%)          | 29<br>(74%)          | 33<br>(85%)          | 33<br>(85%)          | 34<br>(87%)          | 35<br>(90%)          | 36<br>(92%)          | 37<br>(95%)          | -                    | -                    | -                    | -                    |

**F) Linear regression using a mixed effects model (with 95% confidence interval) to determine the effect of artificial bubo characteristics on the percentage difference between the raters' first and second measurements**

| <b>Characteristic</b>     | <b>Estimate</b> | <b>95% CI</b>                | <b>p-value</b> |
|---------------------------|-----------------|------------------------------|----------------|
| <b>Size</b>               | -0.0012943      | -0.001412802 to -0.001175798 | 0.033330       |
| <b>Density</b>            | 0.0119047       | -0.05416122 to 0.07797062    | 0.724270       |
| <b>Presence of oedema</b> | 0.0493535       | -0.01926767 to 0.1179747     | 0.159961       |

**G) Number and percentage of interrater measurements that were within 5% intervals of the measurements of other raters of the same artificial bubo, shown until 95% of all measurements are captured**

|                                | 5%<br>n (%)   | 10%<br>n (%)   | 15%<br>n (%)   | 20%<br>n (%)   | 25%<br>n (%)   | 30%<br>n (%)   | 35%<br>n (%)   | 40%<br>n (%)   | 45%<br>n (%)   | 50%<br>n (%)   | 55%<br>n (%)   | 60%<br>n (%)   | 65%<br>n (%)  |
|--------------------------------|---------------|----------------|----------------|----------------|----------------|----------------|----------------|----------------|----------------|----------------|----------------|----------------|---------------|
| <b>Overall<br/>(N=34655)</b>   | 6924<br>(20%) | 13056<br>(38%) | 18572<br>(54%) | 22903<br>(66%) | 26087<br>(75%) | 28426<br>(82%) | 30205<br>(87%) | 31294<br>(90%) | 32010<br>(92%) | 32491<br>(94%) | 32771<br>(95%) | -              | -             |
| <b>Hard<br/>(N=17286)</b>      | 3766<br>(22%) | 7042<br>(41%)  | 9867<br>(57%)  | 12003<br>(69%) | 13478<br>(78%) | 14557<br>(84%) | 15363<br>(89%) | 15877<br>(92%) | 16173<br>(94%) | 16375<br>(95%) | -              | -              | -             |
| <b>Soft<br/>(N=17369)</b>      | 3158<br>(18%) | 6014<br>(35%)  | 8705<br>(50%)  | 10900<br>(63%) | 12609<br>(73%) | 13869<br>(80%) | 14842<br>(85%) | 15417<br>(89%) | 15837<br>(91%) | 16116<br>(93%) | 16334<br>(94%) | 16515<br>(95%) | -             |
| <b>Oedema<br/>(N=11132)</b>    | 2252<br>(20%) | 4245<br>(38%)  | 6019<br>(54%)  | 7415<br>(67%)  | 8429<br>(76%)  | 9130<br>(82%)  | 9690<br>(87%)  | 10034<br>(90%) | 10252<br>(92%) | 10386<br>(93%) | 10482<br>(94%) | 10587<br>(95%) | -             |
| <b>No oedema<br/>(N=23523)</b> | 4672<br>(20%) | 8812<br>(37%)  | 12553<br>(53%) | 15488<br>(65%) | 17658<br>(75%) | 19296<br>(82%) | 20515<br>(87%) | 21260<br>(90%) | 21758<br>(92%) | 22105<br>(94%) | 22289<br>(95%) | -              | -             |
| <b>121.6<br/>(N=5724)</b>      | 1477<br>(26%) | 2733<br>(48%)  | 3765<br>(66%)  | 4273<br>(75%)  | 4930<br>(86%)  | 5208<br>(91%)  | 5389<br>(94%)  | 5469<br>(96%)  | -              | -              | -              | -              | -             |
| <b>120.3<br/>(N=8327)</b>      | 1939<br>(23%) | 3635<br>(44%)  | 5131<br>(62%)  | 6219<br>(75%)  | 6954<br>(84%)  | 7475<br>(90%)  | 7835<br>(94%)  | 7930<br>(95%)  | -              | -              | -              | -              | -             |
| <b>94.7<br/>(N=3912)</b>       | 830<br>(21%)  | 1565<br>(40%)  | 2215<br>(57%)  | 2696<br>(69%)  | 3066<br>(78%)  | 3309<br>(85%)  | 3512<br>(90%)  | 3650<br>(93%)  | 3720<br>(95%)  | -              | -              | -              | -             |
| <b>77.8<br/>(N=7368)</b>       | 1138<br>(15%) | 2206<br>(30%)  | 3166<br>(43%)  | 3963<br>(54%)  | 4592<br>(62%)  | 5128<br>(70%)  | 5604<br>(76%)  | 5999<br>(81%)  | 6333<br>(86%)  | 6561<br>(89%)  | 6765<br>(92%)  | 6904<br>(94%)  | 6968<br>(95%) |
| <b>64.9<br/>(N=3812)</b>       | 700<br>(18%)  | 1360<br>(36%)  | 1952<br>(51%)  | 2498<br>(66%)  | 2935<br>(77%)  | 3230<br>(85%)  | 348<br>(90%)   | 3569<br>(94%)  | 3605<br>(95%)  | -              | -              | -              | -             |
| <b>52.7<br/>(N=5512)</b>       | 840<br>(15%)  | 1558<br>(28%)  | 2343<br>(43%)  | 3054<br>(55%)  | 3610<br>(65%)  | 4076<br>(74%)  | 4417<br>(80%)  | 4677<br>(85%)  | 4893<br>(89%)  | 5054<br>(92%)  | 5119<br>(93%)  | 5175<br>(94%)  | 5224<br>(95%) |
